# Supplementary material for: NMRFx Processor: a cross-platform NMR data processing program
Source: Springer Nature journal article supplement (doi:10.1007/s10858-016-0049-6), 2016-07-25
Supplement: 10858_2016_49_MOESM1_ESM.pdf [file 10858_2016_49_MOESM1_ESM.pdf]

**ADD** Add value to the vector at all points between first and last, where value can either be an integer (real) or a complex number written as  $(1.0 + 3j)$ .

- **value** The value to add to each data point.
  - **default**  $0j$
  - **optional** True
- **first** The first point of the vector to add to.
  - **default** 0
  - **min** 0
  - **max** size - 1
  - **optional** True
- **last** The last point of the vector to add to.
  - **default** -1
  - **min** -1
  - **max** size - 1
  - **optional** True

**AUTOPHASE** Auto Phase shift.

- **firstOrder** Do first order phase correction.
  - **default** False
  - **optional** True
- **maxMode** Autophase by maximizing positive signal.
  - **default** False
  - **optional** True
- **winSize** Size of each half of window used in doing CWTD. Full window is 2 x this value.
  - **default** 2
  - **min** 1
  - **max** 32
  - **optional** True
- **ratio** Ratio relative to noise used in determining if region is signal or baseline.
  - **default** 25.0
  - **min** 1.0
  - **max** 100.0
  - **optional** True

**AUTOREGIONS** Baseline correction using a polynomial fit.

- **mode** Specify the mode for auto identifying baseline regions.
  - **default** sdev
  - **optional** True
- **winSize** Size of window used in searching for baseline regions;
  - **default** 16
  - **min** 4
  - **max** 256
  - **optional** True
- **minBase** Baseline regions must be at least this big;
  - **default** 12
  - **min** 4
  - **max** 256
  - **optional** True

- **ratio** Ratio relative to noise used in determining if region is signal or baseline.
  - **default** 10.0
  - **min** 1.0
  - **max** 100.0
  - **optional** True

**BCPOLY** Baseline correction using a polynomial fit.

- **order** Order of the polynomial used in fit;
  - **default** 2
  - **min** 1
  - **max** 8
  - **optional** True
- **winSize** Size of window used in searching for baseline regions;
  - **default** 16
  - **min** 4
  - **max** 256
  - **optional** True

**BCSINE** Baseline correction using a sine curve.

- **regions** Specify the points of the vector to perform baseline correction on.
  - **default** None
  - **optional** True
- **type** Specify the units for the region values.
  - **default** pts
  - **optional** True
- **invert** Specify the boundary of peaks instead of the baseline.
  - **default** False
  - **optional** True
- **order** Order of the polynomial used in fit;
  - **default** 1
  - **min** 1
  - **max** 8
  - **optional** True
- **winSize** Size of window used in searching for baseline regions;
  - **default** 16
  - **min** 4
  - **max** 256
  - **optional** True
- **ratio** Ratio relative to noise used in determining if region is signal or baseline.
  - **default** 0.0
  - **min** 1.0
  - **max** 100.0
  - **optional** True

**BCWHIT** Baseline correction using a smoother.

- **lamb** Parameter controlling how close the fit to the baseline should be
  - **default** 5000
  - **min** 1000.0

- **max** 20000.0
- **optional** True
- **order** Order of the polynomial used in fit;
  - **default** 1
  - **min** 1
  - **max** 2
  - **optional** True
- **baseline** If true, return the calculated baseline, rather than the corrected vector
  - **default** False
  - **optional** True

**BUCKET** The vector is bucketed by adding adjacent data points. The vector size after this operation will be equal to the specified number of buckets. The original vector size must be a multiple of the number of buckets. Each resulting data point will represent the sum of winSize data points where winSize is equal to size/nBuckets

- **buckets** Number of buckets to place data points into. Vector size must be a multiple of this number.
  - **default** 256
  - **min** 0
  - **max** size
  - **optional** True

**BZ** Zero Bruker DSP baseline and associated algorithms: *sim*, *ph*, *dspph*, *chop*.

- **alg** Algorithm to correct Bruker DSP artifact.
  - **default** ph
  - **optional** True
- **phase** Phase adjust (sim, ph only).
  - **default** 0.0
  - **min** -180
  - **max** 180
  - **optional** True
- **scale** Scale factor (sim only).
  - **default** 1.0
  - **min** -1
  - **max** 3
  - **optional** True

**COMB** combine inVec and outVec with a list of coefficients

- **coef** How to combine data rows with different phases.
  - **default** None
  - **optional** True

**CSHIFT** Circular shift of the data points in the vector by the specified amount.

- **shift** Amount of points to shift the vector by.
  - **default** 0
  - **min** -2048
  - **max** 2048
  - **optional** True

## CWTD Continuous Wavelet Transform Derivative.

- **winSize** Size of the window.
  - **default** 32
  - **min** 1
  - **max** 1024
  - **optional** True

## DC Shifts the spectrum so edges are centered. DC Offset.

- **fraction** The fraction of points from the beginning and end of a spectrum that will be used to create the offset.
  - **default** 0.05
  - **min** 0
  - **max** .33
  - **optional** True

## DCFID Correct DC offset of FID real and imaginary channels

- **fraction** Fraction of end of FID to average to calculate offset
  - **default** 0.06
  - **min** 0.01
  - **max** 0.25
  - **optional** True

## DX Numerical Derivative.

## EA Do echo-anti echo combination

## ESMOOTH Envelope smoothing.

- **winSize** Size of the window
  - **default** 256
  - **optional** True
- **lambda** Parameter controlling how close the fit to the baseline should be
  - **default** 5000
  - **min** 1000.0
  - **max** 50000.0
  - **optional** True
- **order** Parameter controlling the order of the baseline fit
  - **default** 2
  - **min** 1
  - **max** 2
  - **optional** True
- **baseline** If true, return the calculated baseline, rather than the corrected vector
  - **default** False
  - **optional** True

## EXP Exponential Calculation of a Vector. Each point is updated with the exponential value of the point .

## EXPD Exponential Decay Apodization.

- **lb** Line broadening factor.
  - **default** 1.0
  - **min** 0.0
  - **max** 20.0
  - **optional** True
- **fPoint** First point multiplication.
  - **default** 1.0
  - **min** 0.5
  - **max** 1.0
  - **optional** True

**EXTRACT** Extract a specified range of points.

- **start** Start point of region to extract
  - **default** 0
  - **min** 0
  - **max** size-1
  - **optional** True
- **end** End point of region to extract
  - **default** 0
  - **min** 0
  - **max** size-1
  - **optional** True
- **mode** Extract a named region (left,right,all,middle) instead of using start and end points
  - **default** left
  - **optional** True

**FDSS** Frequency Domain Solvent Suppression.

- **center** Position of frequency to suppress. Default is in fractional units with zero at center..
  - **default** 0.0f
  - **min** -0.5
  - **max** 0.5
  - **optional** True
- **start** The beginning of the peak.
  - **default** 0.005f
  - **min** 0.00
  - **max** 0.010
  - **optional** True
- **end** The end of the peak.
  - **default** 0.015f
  - **min** 0.00
  - **max** 0.02
  - **optional** True
- **autoCenter** Find the largest peak in spectrum and center on that.
  - **default** False
  - **optional** True

**FILTER** Generic filter, type is *notch* or *lowpass*.

- **type** Filter type.

- **default** notch
  - **optional** True
- **offset** Frequency offset in fraction of sw.
  - **default** 0
  - **min** -0.5
  - **max** 0.5
  - **optional** True
- **width** Notch width in fraction of sw (notch only).
  - **default** 0.05
  - **min** 0.01
  - **max** 0.09
  - **optional** True
- **factor** Decimation factor (lowpass only).
  - **default** 4
  - **min** 3
  - **max** 20
  - **optional** True
- **groupFactor** Filter sharpness.
  - **default** 8
  - **min** 4
  - **max** 40
  - **optional** True
- **mode** Filter type.
  - **default** zero
  - **optional** True

## FT Fourier Transform.

- **negateImag** Negate imaginary values before the FT
  - **default** False
  - **optional** True
- **negatePairs** Negate alternate complex real/imaginary values before the FT
  - **default** False
  - **optional** True
- **auto** Determine negatePairs from FID parameters
  - **default** False
  - **optional** True

## GAPSMOOTH Solvent suppression by removing signal and filling the gap with a smoothing function.

- **center** Center point of the solvent peak.
  - **default** -1
  - **optional** True
- **start** Beginning point of the solvent peak.
  - **default** -1
  - **optional** True
- **end** End point of the solvent peak.
  - **default** -1
  - **optional** True
- **autoCenter** Find largest peak in spectrum and set that as center
  - **default** False

- **optional** True

**GEN** Generate a simulated signal and add it to the vector.

- **freq** Frequency in Hz.
  - **default** 100.0
  - **min** -500
  - **max** 500.0
  - **optional** True
- **lw** Linewidth in Hz.
  - **default** 1.0
  - **min** 0
  - **max** 10.0
  - **optional** True
- **amp** Amplitude of signal.
  - **default** 50.0
  - **min** 0
  - **max** 100.0
  - **optional** True
- **phase** Phase of signal in degrees.
  - **default** 0.0
  - **min** -180
  - **max** 180.0
  - **optional** True

**GF** Lorentz-to-Gauss.

- **gf** gf: Gaussian broadening
  - **default** 1.0
  - **min** 0.0
  - **max** 20.0
  - **optional** True
- **gfs** gfs: Gaussian center
  - **default** 1.0
  - **min** 0.0
  - **max** 1.0
  - **optional** True
- **fPoint** fpoint: First point multiplier
  - **default** 1.0
  - **min** 0.0
  - **max** 1.0
  - **optional** True

**GM** Lorentz-to-Gauss.

- **g1** g1: Exponential line narrowing
  - **default** 1.0
  - **min** 0.0
  - **max** 20.0
  - **optional** True
- **g2** g2: Gaussian broadening

- **default** 1.0
- **min** 0.0
- **max** 20.0
- **optional** True
- **g3** g3: Gaussian center
  - **default** 0.0
  - **min** 0.0
  - **max** 1.0
  - **optional** True
- **fPoint** fpoint: First point multiplier
  - **default** 1.0
  - **min** 0.0
  - **max** 1.0
  - **optional** True

### **GMB** Gauss Broaden Window.

- **gb** Gaussian Broadening Coefficient.
  - **default** 0.0
  - **min** 0.0
  - **max** 1.0
  - **optional** True
- **lb** Line broadening.
  - **default** 0.0
  - **min** -20.0
  - **max** 20.0
  - **optional** True
- **fPoint** Factor multiplied with the first point.
  - **default** 1.0
  - **min** 0.0
  - **max** 1.0
  - **optional** True

### **HFT** Hilbert Transform

### **IFT** Inverse Fourier Transform

**IMAG** Set the real values equal to the imaginary values and discard the rest.

**INTEGRATE** Set the signal equal to its integral. int : first First point of integration region int : last Last point of integration region

### **IST** Iterative Soft Threshold.

- **threshold** Values above this threshold (multiplied times largest peak) are transferred to IST add buffer.
  - **default** 0.98
  - **min** 0.89
  - **max** 0.99
  - **optional** True
- **iterations** Number of iterations to perform.
  - **default** 500



- **min** 1
- **max** 1000
- **optional** True
- **alg** Name of algorithm to use.
  - **default** std
  - **optional** True
- **timeDomain** Is the end result of the operation in time domain
  - **default** True
  - **optional** True
- **ph0** Apply this zero order phase correction to data before IST.
  - **default** None
  - **min** -360.0
  - **max** 360.0
  - **optional** True
- **ph1** Apply this first order phase correction to data before IST.
  - **default** None
  - **min** -360.0
  - **max** 360.0
  - **optional** True
- **adjustThreshold** Adjust threshold during IST calculation
  - **default** False
  - **optional** True
- **zeroFill** Zero fill vector during IST calculation
  - **default** True
  - **optional** True

#### **ISTMATRIX** Iterative Soft Threshold for 2D Matrix.

- **threshold** Values above this threshold (multiplied times largest peak) are transferred to IST add buffer.
  - **default** 0.9
  - **min** 0.1
  - **max** 1.0
  - **optional** True
- **iterations** Number of iterations to perform.
  - **default** 500
  - **min** 1
  - **max** 1000
  - **optional** True
- **alg** Name of algorithm to use.
  - **default** std
  - **optional** True
- **phase** Array of phase values, 2 per indirect dimension.
  - **default** None
  - **optional** True

**LP** Extend the vector using Linear Prediction. Forward or backward linear prediction can be done. If both are specified then both are done and coefficients averaged (forward-backward LP).

- **fitStart** First point used in fit. Defaults to 0 or 1 (depending on forward/backward mode) if 0;
  - **default** 0
  - **min** 0

- **max** size-1
- **optional** True
- **fitEnd** Last point used in fit. Defaults to size-1 if 0.
  - **default** 0
  - **min** 0
  - **max** size-1
  - **optional** True
- **predictStart** Position of first predicted point. Defaults to size if 0.
  - **default** 0
  - **min** 0
  - **max** size-1
  - **optional** True
- **predictEnd** Position of last predicted point. Defaults to 2\*size-1 if 0.
  - **default** 0
  - **min** 0
  - **max** size\*2-1
  - **optional** True
- **npred** Number of points to predict, only used if predictEnd is 0.
  - **default** 0
  - **min** 0
  - **max** size\*2-1
  - **optional** True
- **ncoef** Number of coefficients. Defaults to size/2 if 0.
  - **default** 0
  - **min** 0
  - **max** size-1
  - **optional** True
- **threshold** Threshold of singular values used in keeping coefficients. Check this??
  - **default** 5
  - **min** 4
  - **max** 10
  - **optional** True
- **backward** Do backwards linear prediction.
  - **default** True
  - **optional** True
- **forward** Do forwards linear prediction.
  - **default** True
  - **optional** True
- **mirror** Do mirror image linear prediction.
  - **default** None
  - **optional** True

**LPR** Replace starting points of the vector using Linear Prediction. Forward or backward linear prediction can be done. If both are specified then both are done and coefficients averaged (forward-backward LP).

- **fitStart** First point used in fit. Defaults to 0 if 0;
  - **default** 0
  - **min** 1
  - **max** size-1
  - **optional** True
- **fitEnd** Last point used in fit. Defaults to size-1 if 0.

- **default** 0
- **min** 0
- **max** size-1
- **optional** True
- **predictStart** Position of first predicted point. Defaults to 0 if < 0.
  - **default** 0
  - **min** 0
  - **max** size/4
  - **optional** True
- **predictEnd** Position of last predicted point. Defaults to 0 if 0.
  - **default** 0
  - **min** 0
  - **max** size/4
  - **optional** True
- **npred** Number of points to predict, only used if predictEnd is 0.
  - **default** 0
  - **min** 0
  - **max** size\*2-1
  - **optional** True
- **ncoef** Number of coefficients. Defaults to size/2 if 0.
  - **default** 0
  - **min** 0
  - **max** size-1
  - **optional** True
- **threshold** Threshold of singular values used in keeping coefficients. Value used is  $10^{\text{-threshold}}$ 
  - **default** 5
  - **min** 3
  - **max** 10
  - **optional** True
- **backward** Do backwards linear prediction.
  - **default** True
  - **optional** True
- **forward** Do forwards linear prediction.
  - **default** True
  - **optional** True

**MAG** Magnitude Calculation of a Vector. Each point is updated with its Complex magnitude.

**MEASURE** Measures regions in spectrum.

- **key** Prefix to key used to store measure values in a map (dictionary). Key will have vector row appended.
  - **default** measures\_
  - **optional** True
- **map** Map in which to store results. If not specified (or = None) the default map will be used. Get the default map with "getMeasureMap()"
  - **default** None
  - **optional** True

**MULT** Multiply the points in a vector by a Real or Complex number.

- **value** Number to multiply the points by.
  - **default** (1+0j)
  - **optional** True
- **first** Points starting from this will be multiplied by value. Default is 0.
  - **default** 0
  - **min** 0
  - **max** size - 1
  - **optional** True
- **last** Last point to multiply the data by. Default is the end of the vector.
  - **default** -1
  - **min** -1
  - **max** size - 1
  - **optional** True

**ONES** Set all points in a vector to 1.0

**PHASE** Phase shift.

- **ph0** Zero order phase value
  - **default** 0.0
  - **min** -360.0
  - **max** 360.0
  - **optional** True
- **ph1** First order phase value
  - **default** 0.0
  - **min** -360.0
  - **max** 360.0
  - **optional** True
- **dimag** Discard imaginary values
  - **default** False
  - **optional** True

**POWER** Power Calculation of a Vector. Each point is updated with its power value.

**PRINT** Print vector.

**RAND** Set all points in a vector to a uniformly distributed random number between 0.0 and 1.0.

**RANDN** Add a Gaussian to a vector.

- **mean** Mean of the Gaussian.
  - **default** 0.0
  - **min** 0.0
  - **max** 100.0
  - **optional** True
- **stdev** Standard deviation of the Gaussian.
  - **default** 1.0
  - **min** 0.1
  - **max** 100.0
  - **optional** True
- **seed** Seed for the RNG.

- **default** 0
- **min** 0
- **optional** True

**RANGE** Sets the values in the vector from first to last inclusive to either the specified value (which can be real or complex (written as  $1.0 + 3j$ ) or Double Min or Double Max.

- **value** Vector will have this value from the 'first' to 'last' elements
  - **default** 0j
  - **optional** True
- **first** The first point of the vector to set.
  - **default** 0
  - **min** 0
  - **max** size-1
  - **optional** True
- **last** The last point of the vector to set.
  - **default** -1
  - **min** -1
  - **max** size-1
  - **optional** True
- **max** Set the value to Double.MAX (instead of min or value). If True, overrides value.
  - **default** False
  - **optional** True
- **min** Set the value to Double.MIN (instead of max or value). If True, overrides value.
  - **default** False
  - **optional** True

**REAL** Make the vector real, discarding the imaginary part

**REGIONS** Baseline correction using a polynomial fit.

- **regions** Specify the points of the vector to perform baseline correction on.
  - **default** None
  - **optional** True
- **type** Specify the units for the region values.
  - **default** frac
  - **optional** True
- **signal** Specify the boundary of peaks instead of the baseline.
  - **default** False
  - **optional** True

**REVERSE** Reverse points in a vector

**RFT** Real fourier transform

- **inverse** True if inverse RFT, False if forward RFT.
  - **default** False
  - **optional** True

**SB** Sine Bell Apodization

- **offset** Offset of sine window.

- **default** 0.5
- **min** 0.0
- **max** 0.5
- **optional** True
- **end** End value of sine window argument.
  - **default** 1.0
  - **min** 0.5
  - **max** 1.0
  - **optional** True
- **power** Exponential power.
  - **default** 2.0
  - **min** 1.0
  - **max** 2.0
  - **optional** True
- **c** First point multiplier.
  - **default** 1.0
  - **min** 0.5
  - **max** 1.0
  - **optional** True
- **apodSize** Size of apodization window. Default of 0 uses entire FID.
  - **default** 0
  - **min** 0
  - **max** size
  - **optional** True

**SCHEDULE** Sets a sample schedule for a 1D vector and zeros points not on schedule. Used for testing IST.

- **fraction** The fraction of points that are collected.
  - **default** 0.05
  - **min** 0.05
  - **max** 1.0
  - **optional** True
- **endOnly** If true, only zero values at end of vector
  - **default** False
  - **optional** True

**SCRIPT** Execute a Python script as an Operation. Current vector is available as object named "vec".

- **script** The script that will be run on each Vec at the stage in the processing queue.
  - **default**
  - **optional** True
- **initialScript** Any initial declarations that will be executed on initialization.
  - **default**
  - **optional** True
- **encapsulate** Whether the interpreter should persist between evaluations or be reinitialized for each evaluation.
  - **default** False
  - **optional** True

**SHIFT** Left or right shift of the data points in the vector by the specified amount.

- **shift** Amount of points to shift the vector by.
  - **default** 1
  - **min** -16
  - **max** 16
  - **optional** True

**SIGN** Change sign of values

- **mode** What elements of vector to change .
  - **default** i
  - **optional** True

**SQRT** Sqrt Calculation of a Vector. Each point is updated with its square root.

**TDCOMB** combine complex inVec and outVec time domain vectors using a list of coefficients

- **dim** Indirect dimension of dataset to combine vectors in. Use 2 for 2D, 2 or 3 for 3D, etc.
  - **default** 2
  - **optional** True
- **coef** How to combine data rows with different phases.
  - **default** None
  - **optional** True

**TDPOLY** Time Domain Polynomial.

- **order** Order of the polynomial.
  - **default** 4
  - **min** 1
  - **max** 10
  - **optional** True
- **winSize** Size of the window
  - **default** 32
  - **min** 1
  - **max** size-1
  - **optional** True
- **start** First point
  - **default** 0
  - **min** 0
  - **max** size-1
  - **optional** True

**TDSS** Time domain solvent suppression.

- **winSize** Window size of moving average filter (+/- this value).
  - **default** 31
  - **min** 1
  - **max** 128
  - **optional** True
- **nPasses** Number of passes of filter. Three is optimal.
  - **default** 3
  - **min** 1

- **max** 3
- **optional** True
- **shift** Position of frequency to suppress. Default is in fractional units with zero at center..
  - **default** 0.0f
  - **min** -0.5
  - **max** 0.5
  - **optional** True

### TM Trapezoid Multiply.

- **pt1** First point to multiply.
  - **default** 0
  - **min** 0
  - **max** size-1
  - **optional** True
- **pt2** Last point to multiply.
  - **default** -1
  - **min** -1
  - **max** size-1
  - **optional** True

### TRI Triangle Window

- **pt1** Middle point of the triangle.
  - **default** 0
  - **min** 0
  - **max** size-1
  - **optional** True
- **lHeight** Height of the left side.
  - **default** 1.0
  - **min** 0.0
  - **max** 1.0
  - **optional** True
- **rHeight** Height of the right side.
  - **default** 0.0
  - **min** 0.0
  - **max** 1.0
  - **optional** True

**VECREF** Sets size, spectrometer frequency and sweep width of vector. Used for simulated FIDs for testing and demonstration.

- **size** Size of vector specified as a power of 2.
  - **default** 8
  - **min** 3
  - **max** 16
  - **optional** True
- **sf** Spectrometer frequency (in MHz).
  - **default** 500.0
  - **min** 0.0
  - **max** 1200.0



- **optional** True
- **sw** Sweep width of spectrum (in Hz).
  - **default** 5000.0
  - **min** 0.0
  - **max** 10000.0
  - **optional** True

**WRITE** Write vector to dataset (normally done automatically).

**ZEROS** Zeros a vector.

**ZF** Zero Fill. factor is the 'factor' power of 2 that the vector size is increased to, so if the vector has 513 elements and factor = 1, it will increase to 1024, the next power of 2, but if factor = 2, it will increase to 2048, which is two powers of two greater. A size can be specified instead of a factor which will be the exact number of points the vector will have, and the increased elements will all be zero.

- **factor** Number of powers of 2 to zero fill to.
  - **default** 1
  - **min** -1
  - **max** 4
  - **optional** True
- **size** Size after zero filling. If -1 (default), calculate from factor value.
  - **default** -1
  - **min** -1
  - **max** 65536
  - **optional** True
- **pad** Increase size by this amount. If -1 (default) use size or factor value.
  - **default** -1
  - **min** -1
  - **max** 128
  - **optional** True
